# Supplementary material for: Creation of hollow SAPO-34 single crystals via alkaline or acid etching
Source: Royal Society of Chemistry journal article supplement (doi:10.1039/c5cc10070d), 2016-01-01
Supplement: c5cc10070d1.pdf [file c5cc10070d1.pdf]

## **Supporting information for**

### **Creation of Hollow SAPO-34 Single Crystals by Alkaline or Acid Etching**

Yuyan Qiao,<sup>a,b</sup> Miao Yang,<sup>a</sup> Beibei Gao,<sup>a,b</sup> Linying Wang,<sup>a</sup> Peng Tian,<sup>\*a</sup> Shutao Xu,<sup>a</sup> Zhongmin Liu<sup>\*a</sup>

<sup>a</sup> National Engineering Laboratory for Methanol to Olefins, Dalian National Laboratory for Clean Energy, Dalian Institute

of Chemical Physics, Chinese Academy of Sciences, Dalian 116023, P. R. China

<sup>b</sup> University of Chinese Academy of Sciences, Beijing 100049, P. R. China

## Experimental Section

### 1. Chemical reagents

All chemical reagents were used without further purification. Orthophosphoric acid (85 wt%), diethylamine (DEA), NaOH and HCl (37 wt%) were purchased from Tianjin Kemiou Chemical Reagent Co., Ltd.. Tetraethylammonium hydroxide (TEAOH, 35 wt%), tetramethylammonium hydroxide (TMAOH, 25 wt%) and tetrapropylammonium hydroxide (TPAOH, 25 wt%) were purchased from Runjing Chemical Co., Ltd.. The other chemical reagents used in the experiments included fumed silica (Shenyang Chemical Co., Ltd.), pseudoboehmite (67.5 wt%, CHINALCO), tetramethyl ethylenediamine (TMEDA, Sinopharm Chemical Reagent Co., Ltd.).

### 2. Preparation of SAPO molecular sieve precursors

**Synthesis of SAPO-34 (SP34-P):** an initial gel with a molar composition of 2.0 TEAOH / 0.5 TMEDA / 1.0 Al<sub>2</sub>O<sub>3</sub> / 1.2 P<sub>2</sub>O<sub>5</sub> / 1.0 SiO<sub>2</sub> / 60 H<sub>2</sub>O was prepared by mixing pseudoboehmite, water, orthophosphoric acid, fumed silica, TEAOH and TMEDA in sequence. Milled SAPO-34 seeds (1 % gel weight) were finally added into the gel under stirring. The crystallization was conducted in a stainless steel autoclave at 200 °C for 16 h under rotation. The as-synthesized product was recovered through filtration, washed, and dried at 110 °C overnight.

**Synthesis of SAPO-20:** an initial gel with a molar composition of 1.5 TMAOH / 1.0 TMEDA / 1.0 Al<sub>2</sub>O<sub>3</sub> / 1.0 P<sub>2</sub>O<sub>5</sub> / 1.0 SiO<sub>2</sub> / 60 H<sub>2</sub>O was prepared by mixing pseudoboehmite, water, orthophosphoric acid, fumed silica, TMAOH and TMEDA in sequence. Milled SAPO-34 seeds (1 % gel weight) were finally added into the gel under stirring. The crystallization was conducted in a stainless steel autoclave at 200 °C for 24 h under rotation. The as-synthesized product was recovered through filtration, washed, and dried at 110 °C overnight.

### 3. Alkaline or acid treatments

All the alkaline or acid treatments conditions were listed in Table 1. Typically, for alkaline treatment, 1 g SAPO-34 precursor was added to 12 g of 0.6 mol/L TEAOH solution. Then the mixture was mixed and heated in an autoclave at 180 °C for 1 h under rotation. The product was recovered through filtration, washed, and dried at 110 °C overnight. For acid treatment, the procedure was similar to the above.

### 4. Characterization

The powder X-ray diffraction (XRD) data were recorded on a PANalytical X'Pert PRO X-ray diffractometer with Cu K $\alpha$  radiation ( $\lambda = 1.54059\text{\AA}$ ) operating at 40 mA and 40 kV. The crystal morphology was observed by field emission scanning electron microscopy (Hitachi SU8020).

Transmission electron microscopy (TEM) images were recorded with a JEM-2100 electron microscope. The bulk and surface compositions of samples were determined with Philips Magix-601 X-ray fluorescence (XRF) spectrometer and VG ESCALAB MK2 X-ray photoelectron spectrometer (XPS). Textural properties of the calcined samples were determined by N<sub>2</sub> adsorption/desorption at -196 °C on a Micromeritics ASAP 2020 system. All the solid state NMR experiments were performed on a Bruker AvanceIII 600 spectrometer equipped with a 14.1 T wide-bore magnet. The resonance frequencies were 156.4, 242.9 and 119.2 MHz for <sup>27</sup>Al, <sup>31</sup>P and <sup>29</sup>Si, respectively. Chemical shifts were referenced to 1.0 M Al(NO<sub>3</sub>)<sub>3</sub> for <sup>27</sup>Al, 85% H<sub>3</sub>PO<sub>4</sub> for <sup>31</sup>P, and 2,2-dimethyl-2-silapentane-5-sulfonate sodium salt (DSS) for <sup>29</sup>Si. <sup>27</sup>Al and <sup>31</sup>P MAS NMR experiments were performed on a 4 mm MAS probe with a spinning rate of 12 kHz. <sup>27</sup>Al MAS NMR spectra were recorded using one pulse sequence. A 200 scans were accumulated with a  $\pi/8$  pulse width of 0.75  $\mu$ s and a 2 s recycle delay. <sup>31</sup>P MAS NMR spectra were recorded using high-power proton decoupling. A 32 scans were accumulated with a  $\pi/4$  pulse width of 2.25  $\mu$ s and a 30 s recycle delay. <sup>29</sup>Si CP/MAS NMR spectra were recorded with a 4 mm MAS probe with a spinning rate of 8 kHz. A 4096 scans were accumulated with a contact time of 3 ms and a recycle delay of 2 s. The temperature-programmed desorption of ammonia (NH<sub>3</sub>-TPD) was carried out with an Autochem 2920 equipment (Micromeritics). The calcined samples (100 mg, 40-60 mesh) was activated at 650 °C for 60 min (10 °C/min) in He, and then cooled down and saturated with ammonia at 150 °C for 30 min. After the samples were purged with He (30 ml/min) for 30 min, the measurements of the desorbed NH<sub>3</sub> were performed from 150 to 650 °C (10 °C/min) under He (30 ml/min).

## 5. Catalytic testing

Alkylation of benzene with benzyl alcohol was performed in autoclave. 0.15 g of the catalyst was transferred to the 100 ml Parr reactor; Then 29.8 g benzene (99.5%) and 0.52 g benzyl alcohol (98%) were added in sequence resulting in a molar ratio of benzene to benzyl alcohol of 80. The reactor was purged with nitrogen and maintained a permanent pressure of 20–25 bars during the reaction, so the reactants could keep in the liquid phase at the reaction temperature of 140 °C. The mixture was stirred at 300 rpm throughout the run, which was determined to be sufficiently fast. After 1 h reaction, a small amount of liquid sample were withdrawn and analyzed by using GC–MS equipped with a capillary HP-5 (Agilent Technologies) column.

**Table S1.** Conditions for base and acid treatments of SAPO molecular sieves

| Sample        | Reagent | C <sup>a</sup> | LSR <sup>b</sup> | T(°C) | t(h) | R (r/min) <sup>c</sup> | Product       | Solid yield |
|---------------|---------|----------------|------------------|-------|------|------------------------|---------------|-------------|
| SP34-TEAOH    | TEAOH   | 0.6            | 12               | 180   | 1    | 60                     | CHA           | 35%         |
| SP34-TPAOH    | TPAOH   | 0.6            | 12               | 180   | 1    | 60                     | CHA           | 38%         |
| SP34-TMAOH    | TMAOH   | 0.9            | 12               | 180   | 1    | 60                     | CHA           | 39%         |
| SP34-DEA      | DEA     | 1              | 10               | 180   | 1    | 60                     | CHA           | 42%         |
| SP34-NaOH     | NaOH    | 0.63           | 20               | 80    | 6    | 60                     | amorphous     | 48%         |
| SP34-HCl      | HCl     | 0.58           | 10               | 80    | 3    | 60                     | CHA           | 25%         |
| SP34-HCl-i    | HCl     | 0.96           | 10               | 180   | 1    | 60                     | amorphous     | 27%         |
| SAPO-20-TMAOH | TMAOH   | 0.5            | 10               | 200   | 16   | 10                     | SOD           | 38%         |
| SAPO-20-HCl   | HCl     | 0.9            | 11               | 180   | 1    | 60                     | SOD+amorphous | 22%         |

<sup>a</sup> The concentration of base or acid aqueous solution (mol/L). <sup>b</sup> Liquid to solid ratio (ml/g). <sup>c</sup> The tumbling speed during treatment.

**Table S2.** Bulk and surface compositions of the sample.

| Sample  | Product composition                                        |                                                            | R <sup>c</sup> |
|---------|------------------------------------------------------------|------------------------------------------------------------|----------------|
|         | Bulk <sup>a</sup>                                          | Surface <sup>b</sup>                                       |                |
| SAPO-20 | Si <sub>0.209</sub> Al <sub>0.435</sub> P <sub>0.357</sub> | Si <sub>0.488</sub> Al <sub>0.284</sub> P <sub>0.228</sub> | 2.33           |

<sup>a</sup> Determined by XRF. <sup>b</sup> Determined by XPS. <sup>c</sup>  $R = [\text{Si}/(\text{Al} + \text{P} + \text{Si})]_{\text{surface}} / [\text{Si}/(\text{Al} + \text{P} + \text{Si})]_{\text{bulk}}$

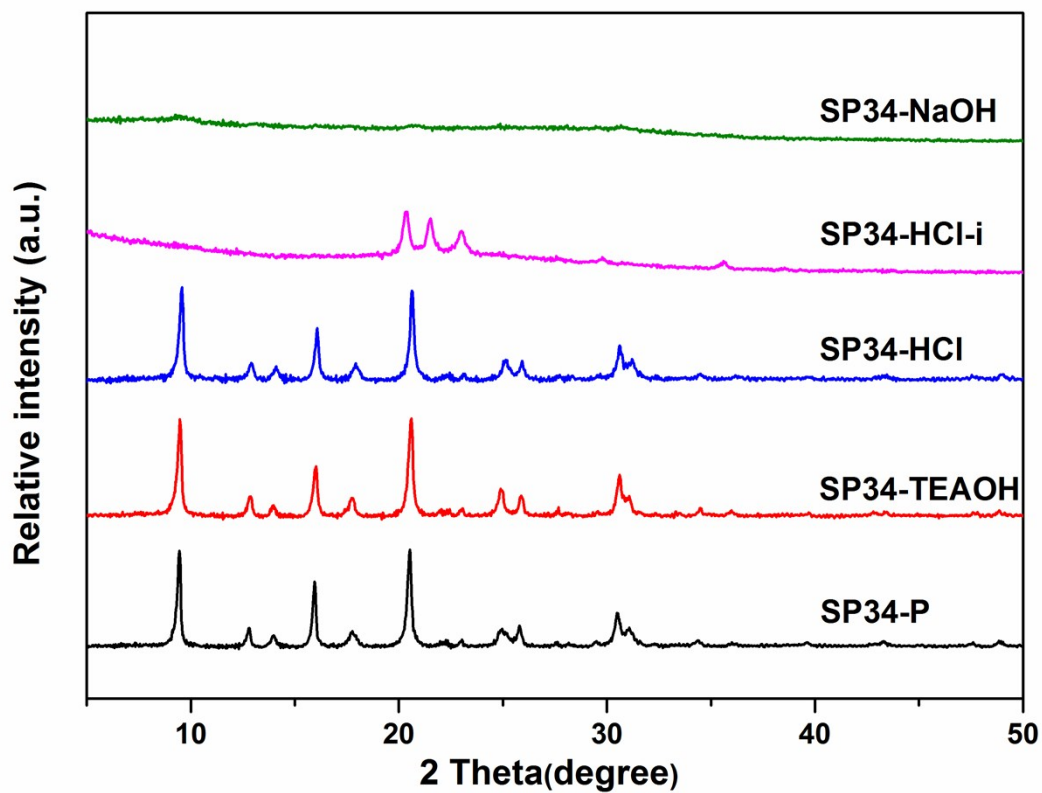

**Figure S1.** The XRD patterns of the samples.

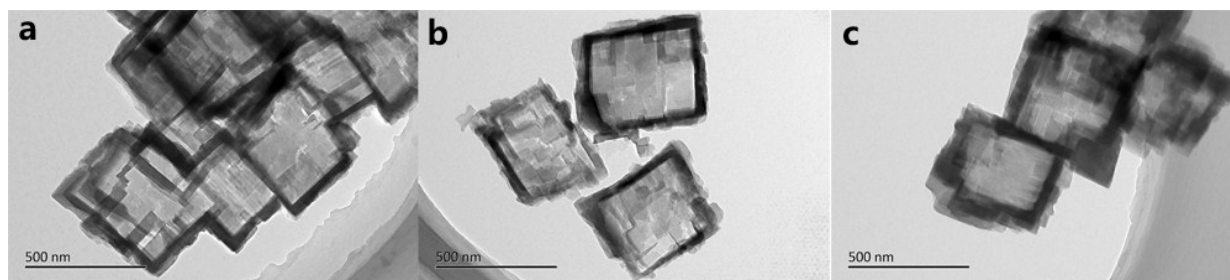

**Figure S2.** The TEM images of the base-treated samples: (a) SP34-TPAOH, (b) SP34-TMAOH, (c) SP34-DEA.

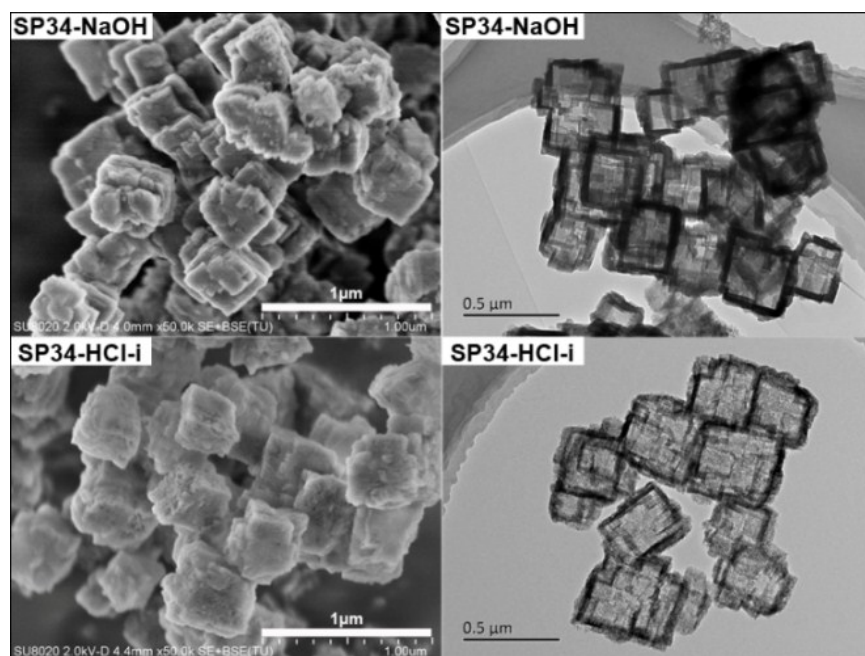

**Figure S3.** The SEM (left) and TEM (right) images of SP34-NaOH and SP34-HCl-i.

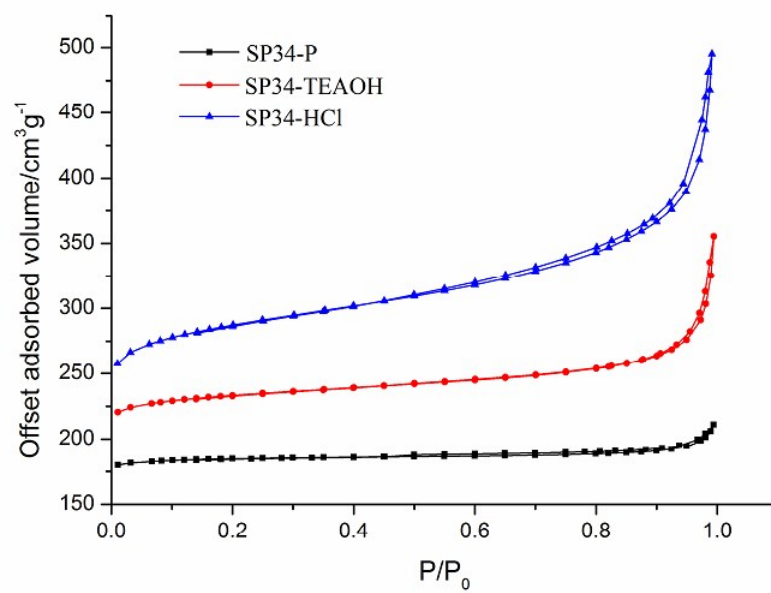

**Figure S4.** The N<sub>2</sub> adsorption-desorption isotherms of the samples.

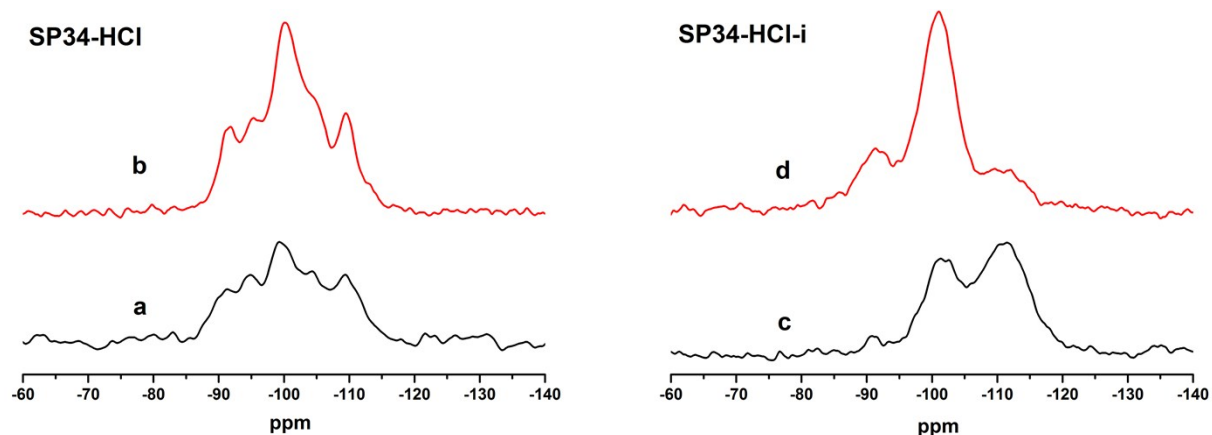

**Figure S5.** The  $^{29}\text{Si}$  MAS NMR (a, c) and  $^1\text{H} \rightarrow ^{29}\text{Si}$  CP MAS NMR (b, d) spectra of SP34-HCl and SP34-HCl-i.

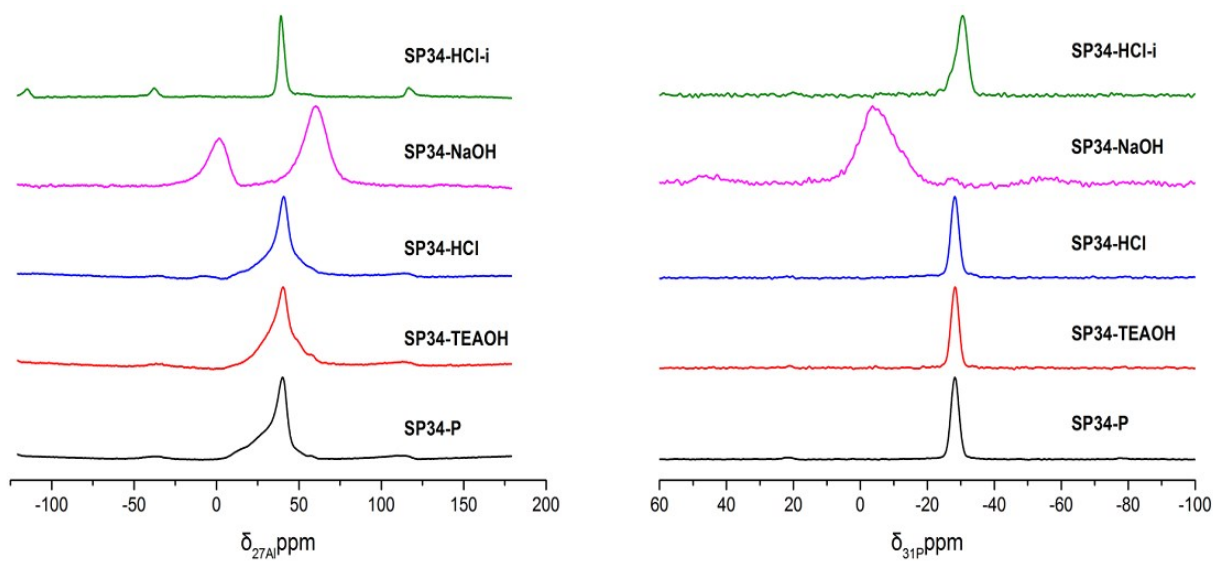

**Figure S6.** The  $^{27}\text{Al}$  and  $^{31}\text{P}$  MAS NMR spectra of the samples.

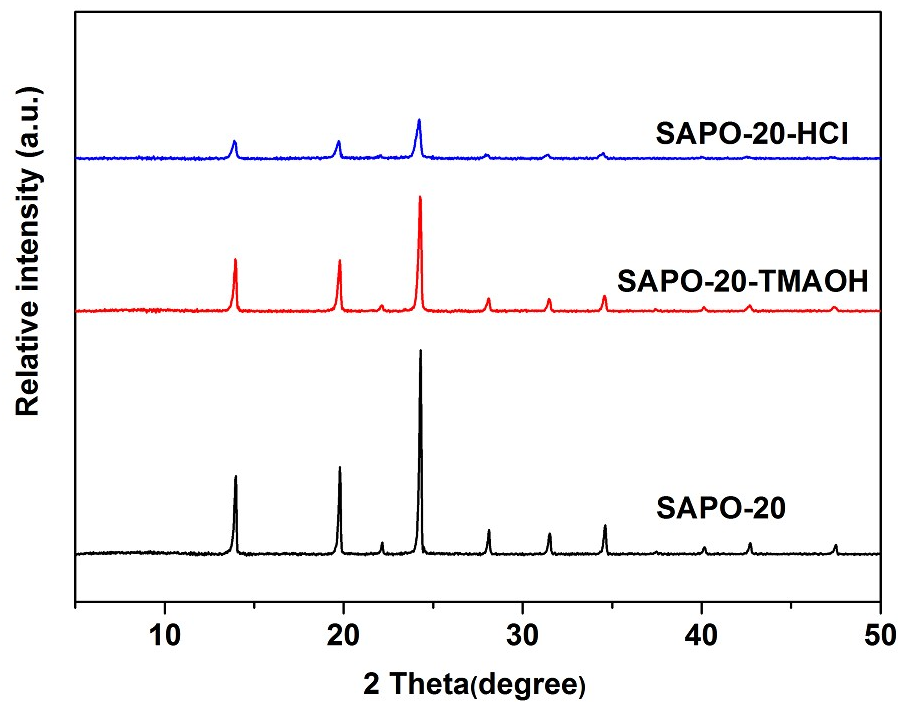

**Figure S7.** The XRD patterns of SAPO-20 and its acid/base-treated samples.



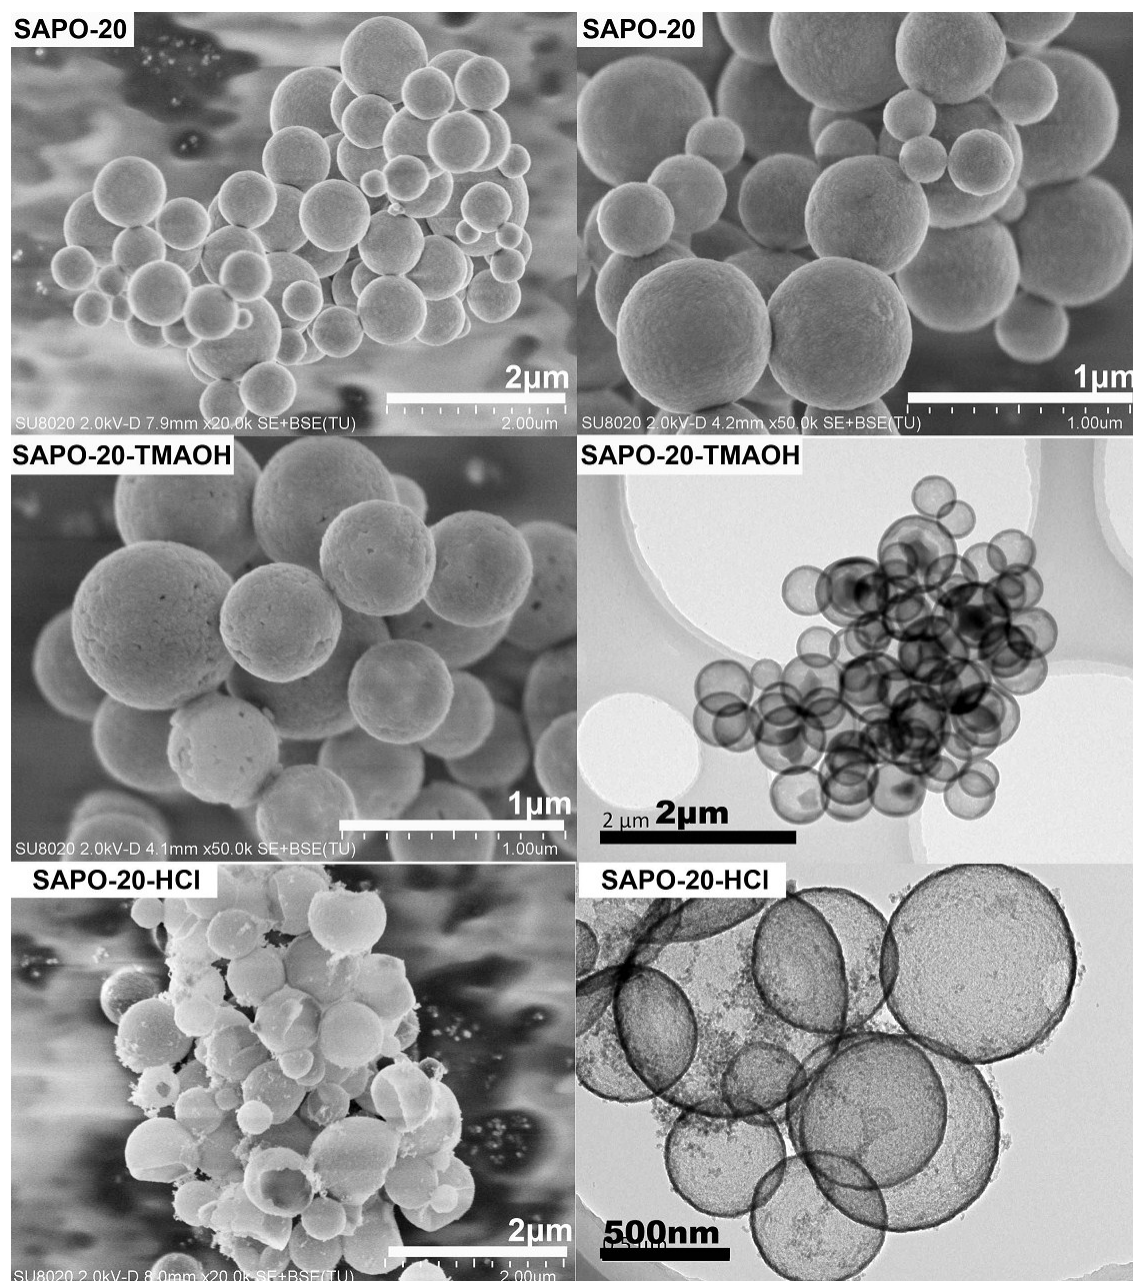

**Figure S8.** The SEM and TEM images of SAPO-20 and its acid/base-treated samples.

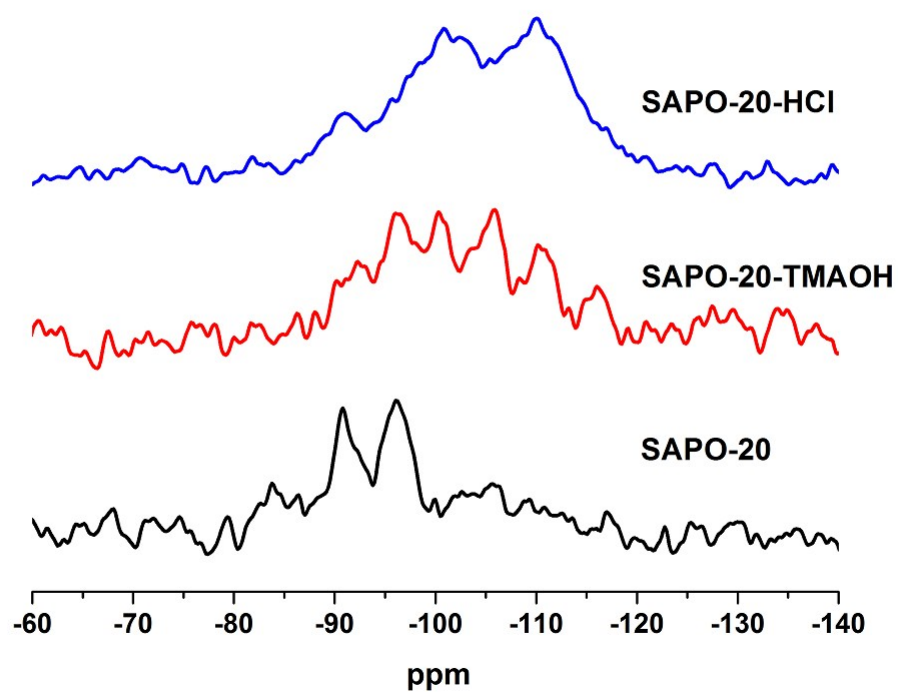

**Figure S9.** The  $^{29}\text{Si}$  MAS NMR spectra of SAPO-20 and its acid/base-treated samples.

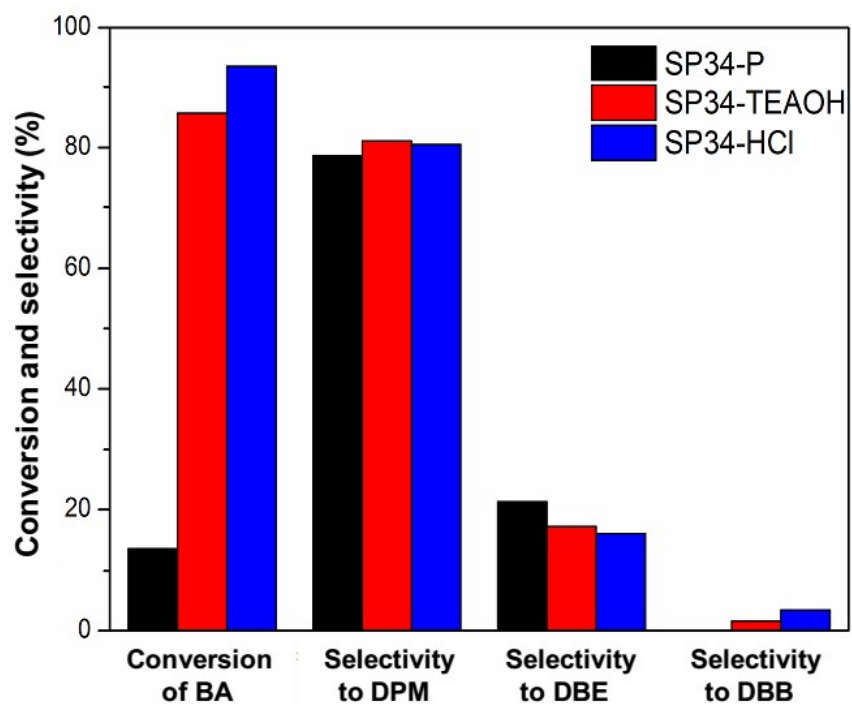

**Figure S10.** Results of alkylation of benzene with benzyl alcohol (BA) over the samples (DPM: diphenyl methane, DBE: dibenzyl ether, DBB: dibenzyl benzene).

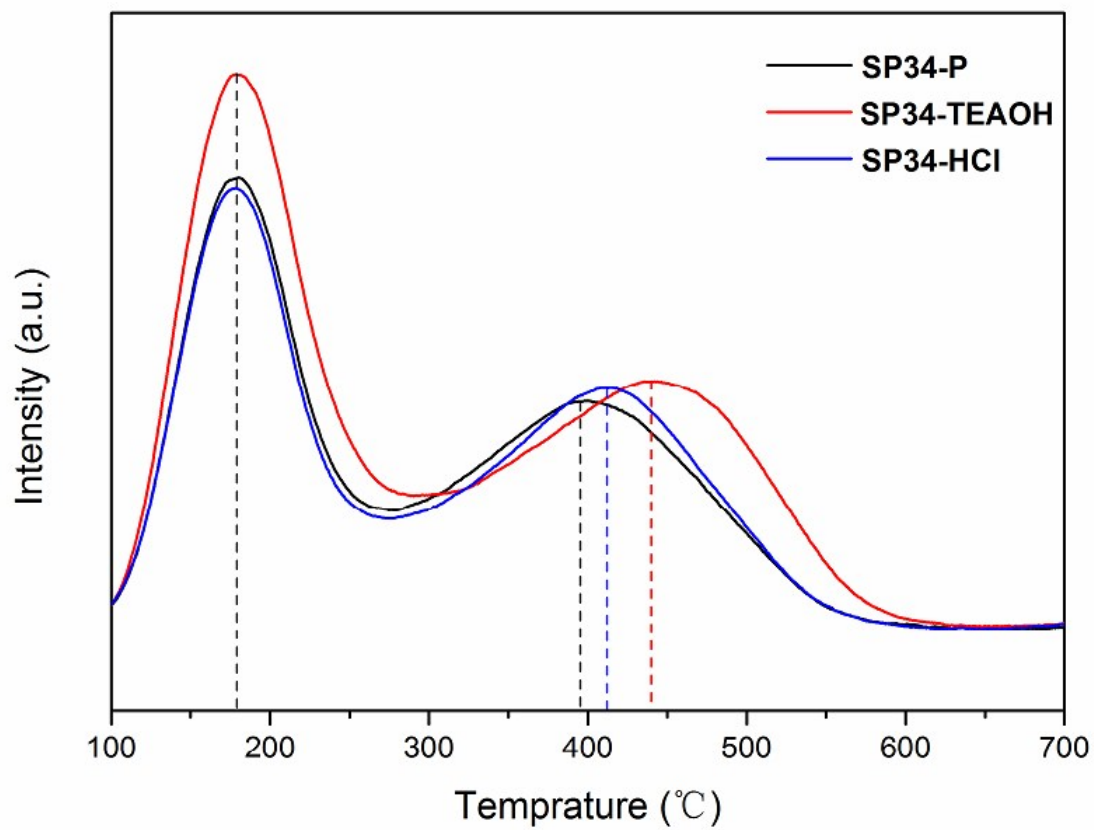

**Figure S11.** NH<sub>3</sub>-TPD curves of the samples.
